# Supplementary material for: Resource use, costs, and approval times for planning and preparing a randomized clinical trial before and after the implementation of the new Swiss human research legislation
Source: PLoS One. 2019 Jan 11;14(1):e0210669. doi: 10.1371/journal.pone.0210669 (PMC6329511; doi:10.1371/journal.pone.0210669)
Supplement: S2 File — (XLSX) [file pone.0210669.s002.xlsx]

## Sheet: Study Info
	Study Information
	Please complete below the relevant study information on this tab.
	Study Title/Acronym:
	Contact Details:
	Name Sponsor/Investigator
	Tel:
	Email:
	Number of involved research sites:
	Number of involved countries:
	Principal research site:
	Date first patient enrolled:
	Date of last patient enrolled if recruitment is complete:
	Place/care facility where patients were recruited? (e.g. Hospital, general practice)
	Title of main publication(s):
	Total number of patients/participants planned to be recruited for this study:								patients/participants
	Number of patients/participants (currently) screened for this study:								patients/participants
	Number of patients/participants (currently) recruited for this study:								patients/participants

## Sheet: Project development & preparati
Costs for project development and preparation phase of your RCT
					Time effort in days																	Unit costs		Total
Cost type	Main category	Items	Comments/Specify	Please indicate if not applicable / not known	Coordinating PI	Investigator	Research nurse / coordinator	Medical staff (senior)	Medical staff (junior)	Administrative staff	Statistician	IT support / Data manager	Data safety / monitoring board	Monitor	Laboratory staff	Other (1)	Other (2)	Other (3)	Other (4)	Other (5)	Other (6)	Number of units	Costs per unit in CHF	Total cost in CHF
INSTRUCTIONS: For the development and preparation phase of your RCT, we would like you to retrospectively assess/estimate the following two cost components: - Part I: Salary costs - please report time efforts in days of all personnel involved in the study and, optionally, salary levels (see sheet "OPTIONAL-Staff rates") - Part II: Other/fixed costs including all fixed cost estimates related to ma…
Part I
Salary costs:																												0
	Protocol and forms	Preparation (e.g. literature review, development of idea, writing, meeting time with external experts, etc.) and development of research protocol			0	0	0	0	0	0	0	0	0	0	0	0	0	0	0	0	0			0				0
		Preparation of grant proposals and related documents (e.g. for SNF application)			0	0	0	0	0	0	0	0	0	0	0	0	0	0	0	0	0			0
		Preparation of application to ethics committee, authorities, insurance (e.g. writing of informed consents, specific documents, submission; but not fees)			0	0	0	0	0	0	0	0	0	0	0	0	0	0	0	0	0			0
		Development/updating of investigational brochure			0	0	0	0	0	0	0	0	0	0	0	0	0	0	0	0	0			0
		Development of case report forms and all patient-related forms (e.g. questionnaires, diaries, advertisement for recruitment, etc.)			0	0	0	0	0	0	0	0	0	0	0	0	0	0	0	0	0			0
		Preparation of data management plan			0	0	0	0	0	0	0	0	0	0	0	0	0	0	0	0	0			0
		Preparation of statistical analysis plan			0	0	0	0	0	0	0	0	0	0	0	0	0	0	0	0	0			0
		Preparation of monitoring plan			0	0	0	0	0	0	0	0	0	0	0	0	0	0	0	0	0			0
	Budget	Preparation and calculation of budget (study budget calculation and controlling, financial administration, negotiations)			0	0	0	0	0	0	0	0	0	0	0	0	0	0	0	0	0			0
	Communication	Communication with funders, authorities, registering in clinical trial portal / registries			0	0	0	0	0	0	0	0	0	0	0	0	0	0	0	0	0			0
		Communication with involved sites for study set-up, organisational issues			0	0	0	0	0	0	0	0	0	0	0	0	0	0	0	0	0			0
		Communication with other involved stakeholders (e.g. pharmacy, laboratory, etc.)			0	0	0	0	0	0	0	0	0	0	0	0	0	0	0	0	0			0
		Acquiring study drug/intervention (e.g. from pharmacy, including communication regarding preparation, communication, logistics, packaging and labelling of study drugs)			0	0	0	0	0	0	0	0	0	0	0	0	0	0	0	0	0			0
	Staff training	Specific staff training on site			0	0	0	0	0	0	0	0	0	0	0	0	0	0	0	0	0			0
	Set-up of site / management	Initiation monitoring visit			0	0	0	0	0	0	0	0	0	0	0	0	0	0	0	0	0			0
		Set up of Trial Master File (TMF) (sponsor)			0	0	0	0	0	0	0	0	0	0	0	0	0	0	0	0	0			0
		Set-up Investigator Site File (ISF)			0	0	0	0	0	0	0	0	0	0	0	0	0	0	0	0	0			0
		Site-specific coordination/preparation of study procedures			0	0	0	0	0	0	0	0	0	0	0	0	0	0	0	0	0			0
	Database	Data entry system set-up and equipment (incl. data entry platform / database development, testing)			0	0	0	0	0	0	0	0	0	0	0	0	0	0	0	0	0			0
	Biobank (if applicable)	Biobank set up			0	0	0	0	0	0	0	0	0	0	0	0	0	0	0	0	0			0
	Other	Other (please specify)			0	0	0	0	0	0	0	0	0	0	0	0	0	0	0	0	0			0
		Other (please specify)			0	0	0	0	0	0	0	0	0	0	0	0	0	0	0	0	0			0
		Other (please specify)			0	0	0	0	0	0	0	0	0	0	0	0	0	0	0	0	0			0
		Other (please specify)			0	0	0	0	0	0	0	0	0	0	0	0	0	0	0	0	0			0
		Other (please specify)			0	0	0	0	0	0	0	0	0	0	0	0	0	0	0	0	0			0
		Other (please specify)			0	0	0	0	0	0	0	0	0	0	0	0	0	0	0	0	0			0
		Other (please specify)			0	0	0	0	0	0	0	0	0	0	0	0	0	0	0	0	0			0
		Other (please specify)			0	0	0	0	0	0	0	0	0	0	0	0	0	0	0	0	0			0
		Other (please specify)			0	0	0	0	0	0	0	0	0	0	0	0	0	0	0	0	0			0
		Other (please specify)			0	0	0	0	0	0	0	0	0	0	0	0	0	0	0	0	0			0
Part II
Other/fixed costs:
	Approval fees	Ethical approval (fee)																				0	0	0
		Health authority fee (e.g. Swissmedic)																				0	0	0
		Trial registration (fee)																				0	0	0
		Other fees																						0
	Insurance	Insurance costs																				0	0	0
	Fixed support costs (e.g. Clinical Trial Unit)	Fixed costs for support (e.g. consulting, sample size calculation, data base set up; please specify)																				0	0	0
		Other fixed support costs																				0	0	0
	Infrastructure	Other study-specific investments in infrastructure (e.g. freezer) If the infrastructure can be used for other studies/routine work, please estimate the relative costs.																				0	0	0
		Trial-specific equipment hire/purchase (e.g. information technology, mobile applications etc., time spent searching for and ordering e.g. instruments and devices that are not included in overhead costs)																				0	0	0
	Travel costs	Initial investigator meetings & travelling (incl. hotel stays, mileage, meals)																				0	0	0
	Other costs	Other (please specify)																				0	0	0
		Other (please specify)																				0	0	0
		Other (please specify)																				0	0	0
		Other (please specify)																				0	0	0
		Other (please specify)																				0	0	0
		Other (please specify)																				0	0	0
		Other (please specify)																				0	0	0
		Other (please specify)																				0	0	0
		Other (please specify)																				0	0	0
		Other (please specify)																				0	0	0
Total study-phase related resources / costs					0	0	0	0	0	0	0	0	0	0	0	0	0	0	0	0	0	0	0	0
Dropdown:
Not applicable
Not known

## Sheet: Enrolment, Treatment, Follow u
Patient enrolment, Treatment, Follow-up
					Time effort per patient in min (time per patient, in min (Part II)); Time effort in days (Part III);																	Unit	Unit costs
Cost type	Main category	Items	Comments/Specify	Please indicate if not applicable / not known	Coordinating PI	Investigator	Research nurse / coordinator	Medical staff (senior)	Medical staff (junior)	Administrative staff	Statistician	IT support / Data manager	Data safety / monitoring board	Monitor	Laboratory staff	Other (1)	Other (2)	Other (3)	Other (4)	Other (5)	Other (6)	Number of units	Costs per unit in CHF	Total cost in CHF
INSTRUCTIONS: For the Patient enrolment, Treatment, Follow-up phase of your RCT, we would like you to retrospectively assess/estimate the following data and cost components: - Part I: Flow-chart: Please specify in "Unit" (column W) how many patients were pre-screened, screened, randomised, treated with intervention, treated with control, and number of patients lost at follow-up. - Part II: Salary…
Part I
Number of patients:	Flow-chart	Number of patients pre-screened (if applicable)																				0
		Number of patients screened																				0
		Number of patients randomised																				0
		Number of patients treated (intervention)																				0
		Number of patients treated (control)																				0
		Number of patients treated (other treatment arms, if applicable, please specify)																				0
		Number of patients lost to follow-up																				0
Part II
Salary costs:					Time effort per patient in min																							#REF!
	(Pre-)Screening	Per patient: Identification of potentially eligible patients (pre-screening or advertisement; if applicable)			0	0	0	0	0	0	0	0	0	0	0	0	0	0	0	0	0			0				#REF!
		Per patient: Screening of patients			0	0	0	0	0	0	0	0	0	0	0	0	0	0	0	0	0			0
		Per patient: Time for clinical services provided specifically for the purposes of screening and health assessment (e.g. physical examinations, medical history, laboratory tests, excl. standard care procedures)			0	0	0	0	0	0	0	0	0	0	0	0	0	0	0	0	0			0
	Patient specific documents	Per patient: Preparation of patient specific documents (e.g. preparation of study folder)			0	0	0	0	0	0	0	0	0	0	0	0	0	0	0	0	0			0
	Consent	Per patient: Informed consent process (excl. development of consent form)			0	0	0	0	0	0	0	0	0	0	0	0	0	0	0	0	0			0
	Randomisation	Per patient: Patient randomisation and concealment of allocation			0	0	0	0	0	0	0	0	0	0	0	0	0	0	0	0	0			0
	Baseline characteristics	Per patient: Time for clinical services provided specifically at the beginning of the study (e.g. physical examinations, questionnaires, laboratory tests, imaging, excl. standard of care procedure)			0	0	0	0	0	0	0	0	0	0	0	0	0	0	0	0	0			0
	Intervention	Per patient: Total time per patient for application of intervention			0	0	0	0	0	0	0	0	0	0	0	0	0	0	0	0	0			0
	Control	Per patient: Total time per patient for application of control intervention (if time requirement different from intervention and control not equal to standard of care)			0	0	0	0	0	0	0	0	0	0	0	0	0	0	0	0	0			0
	Outcome	Per patient: Study-specific outcome assessment (e.g. blood sampling, questionnaire administration, etc.; if the patient would receive standard treatment in a non RCT setting then: additional time compared to standard observation)			0	0	0	0	0	0	0	0	0	0	0	0	0	0	0	0	0			0
	Data collection	Per patient: Source Data completion			0	0	0	0	0	0	0	0	0	0	0	0	0	0	0	0	0			0
		Source data transfer to electronic case report form (eCRF) completion) per patient			0	0	0	0	0	0	0	0	0	0	0	0	0	0	0	0	0			0
	Patient follow-up	Per patient: Follow-up visit(s), including assessments such as telephone interviews, data entry, etc.			0	0	0	0	0	0	0	0	0	0	0	0	0	0	0	0	0			0
	Adverse events	Per patient: Assessing, treating, documenting, and reporting adverse events/serious adverse events			0	0	0	0	0	0	0	0	0	0	0	0	0	0	0	0	0			0
	Specimen collection	Per patient: Biospecimen collection, processing, and analysis (e.g. laboratory)			0	0	0	0	0	0	0	0	0	0	0	0	0	0	0	0	0			0
	Other	Other working step (please specify)			0	0	0	0	0	0	0	0	0	0	0	0	0	0	0	0	0			0
		Other working step (please specify)			0	0	0	0	0	0	0	0	0	0	0	0	0	0	0	0	0			0
		Other working step (please specify)			0	0	0	0	0	0	0	0	0	0	0	0	0	0	0	0	0			0
		Other working step (please specify)			0	0	0	0	0	0	0	0	0	0	0	0	0	0	0	0	0			0
		Other working step (please specify)			0	0	0	0	0	0	0	0	0	0	0	0	0	0	0	0	0			0
		Other working step (please specify)			0	0	0	0	0	0	0	0	0	0	0	0	0	0	0	0	0			0
Part III
Salary costs independent from number of patients:					Time effort in days
	Data management / Analyses	Ongoing data management			0	0	0	0	0	0	0	0	0	0	0	0	0	0	0	0	0			0
		Interim analyses			0	0	0	0	0	0	0	0	0	0	0	0	0	0	0	0	0			0
	Trial monitoring	Ongoing trial monitoring, documentation, and reporting			0	0	0	0	0	0	0	0	0	0	0	0	0	0	0	0	0			0
		Meeting time of Data Safety Monitoring Committee, if applicable			0	0	0	0	0	0	0	0	0	0	0	0	0	0	0	0	0			0
	Communication	Ongoing communication with sites and staff			0	0	0	0	0	0	0	0	0	0	0	0	0	0	0	0	0			0
	Staff training	Ongoing staff training / re-training			0	0	0	0	0	0	0	0	0	0	0	0	0	0	0	0	0			0
	Other	Other working step (please specify)			0	0	0	0	0	0	0	0	0	0	0	0	0	0	0	0	0			0
		Other working step (please specify)			0	0	0	0	0	0	0	0	0	0	0	0	0	0	0	0	0			0
		Other working step (please specify)			0	0	0	0	0	0	0	0	0	0	0	0	0	0	0	0	0			0
		Other working step (please specify)			0	0	0	0	0	0	0	0	0	0	0	0	0	0	0	0	0			0
Part IV
Other/fixed costs:
	Materials/drugs	Costs of drugs/intervention (which are not standard of care/paid by health insurance)																				0	0	0
		Biospecimen analysis (laboratory), if not specified above																				0	0	0
		Additional procedures specifically used for the RCT (e.g. images, PET Scans, etc.), excl. standard of care procedures																				0	0	0
		Costs of drugs/intervention (which are not standard of care/paid by health insurance)																				0	0	0
		Additional material specifically used for the RCT (which is not included in standard of care, e.g. tubes, lab materials, test, etc.)																				0	0	0
	Patient reimbursement	Reimbursement/payment for patients																				0	0	0
	Adverse events	Materials and drugs to treat adverse events																				0	0	0
	Travel costs	Travel costs (e.g. site visits, DSMB meetings, conferences, investigator meetings, etc.)																				0	0	0
		Other material costs																				0	0	0
		Other material costs																				0	0	0
		Other material costs																				0	0	0
		Other material costs																				0	0	0
		Other material costs																				0	0	0
		Other material costs																				0	0	0
		Other material costs																				0	0	0
		Other material costs																				0	0	0
		Other material costs																				0	0	0
Total participant related costs					0	0	0	0	0	0	0	0	0	0	0	0	0	0	0	0	0	0	0	0
Dropdown:
Not applicable
Not known

## Sheet: After last patient out
After last patient out
					Time effort in days																	Unit	Unit costs
Cost type	Main category	Items	Comments/Specify	Please indicate if not applicable / not known	Coordinating PI	Investigator	Research nurse / coordinator	Medical staff (senior)	Medical staff (junior)	Administrative staff	Statistician	IT support / Data manager	Data safety / monitoring board	Monitor	Laboratory staff	Other (1)	Other (2)	Other (3)	Other (4)	Other (5)	Other (6)	Number of units	Costs per unit in CHF	Total cost in CHF
INSTRUCTIONS: For the "After last patient out" phase of your RCT, we would like you to retrospectively assess/estimate the following two cost components: - Part I: Salary costs, calculated by time efforts in days of all personnel involved in the study and multiplied by staff rates (see sheet "OPTIONAL-Staff rates") - Part II: Other/fixed costs including all fixed cost estimates related to materia…
Part I
Salary costs:
	Data cleaning / management	Data cleaning, data management, database lock			0	0	0	0	0	0	0	0	0	0	0	0	0	0	0	0	0			0				#REF!
	Statistical analyses	Statistical analyses (incl. graphical representation for publication etc.)			0	0	0	0	0	0	0	0	0	0	0	0	0	0	0	0	0			0				#REF!
	Presentation of results	Preparation of results for a conference (including abstract submission)			0	0	0	0	0	0	0	0	0	0	0	0	0	0	0	0	0			0
		Time spent at conferences / meetings			0	0	0	0	0	0	0	0	0	0	0	0	0	0	0	0	0			0
	Publication	Manuscript preparation, submission, revision(s), proofs, until final acceptance			0	0	0	0	0	0	0	0	0	0	0	0	0	0	0	0	0			0
	Biospecimen	Biospecimen storage/destruction (central and local)			0	0	0	0	0	0	0	0	0	0	0	0	0	0	0	0	0			0
	Reporting	Reporting to sites, funding agencies, authorities, registries, etc.			0	0	0	0	0	0	0	0	0	0	0	0	0	0	0	0	0			0
	Other	Other (please specify)			0	0	0	0	0	0	0	0	0	0	0	0	0	0	0	0	0			0
		Other (please specify)			0	0	0	0	0	0	0	0	0	0	0	0	0	0	0	0	0			0
		Other (please specify)			0	0	0	0	0	0	0	0	0	0	0	0	0	0	0	0	0			0
		Other (please specify)			0	0	0	0	0	0	0	0	0	0	0	0	0	0	0	0	0			0
		Other (please specify)			0	0	0	0	0	0	0	0	0	0	0	0	0	0	0	0	0			0
		Other (please specify)			0	0	0	0	0	0	0	0	0	0	0	0	0	0	0	0	0			0
		Other (please specify)			0	0	0	0	0	0	0	0	0	0	0	0	0	0	0	0	0			0
Part II
Other/fixed costs:
	Presentation of results	Conference fees and expenses																				0	0	0				#REF!
		Publication fees																				0	0	0				#REF!
	Support costs	Fixed costs for support (e.g. statistical support; please specify)																				0	0	0
		Other (please specify)																				0	0	0
		Other (please specify)																				0	0	0
		Other (please specify)																				0	0	0
		Other (please specify)																				0	0	0
		Other (please specify)																				0	0	0
		Other (please specify)																				0	0	0
		Other (please specify)																				0	0	0
		Other (please specify)																				0	0	0
Total study-phase related resources / costs					0	0	0	0	0	0	0	0	0	0	0	0	0	0	0	0	0	0	0	0
Dropdown:
Not applicable
Not known

## Sheet: OPTIONAL - Staff rates
	Staff rates used for this study
	If available, please provide yeary gross salary rates of the involved study personnel, which allows to directly calculate salary costs from the time estimates you provide in sheet "Project development & preparation".
	Please indicate costing currency (will be automatically applied to all costing sheets):		CHF
		Comments/Specify	Yearly gross salary (CHF):	Daily rate (CHF):
	Coordinating PI		0	0			0
	Investigator		0	0			0
	Research nurse / coordinator		0	0			0
	Medical staff (senior)		0	0			0
	Medical staff (junior)		0	0			0
	Administrative staff		0	0			0
	Statistician		0	0			0
	IT support / Data manager		0	0			0
	Data safety / monitoring board		0	0			0
	Monitor		0	0			0
	Laboratory staff		0	0			0
	Other (1)		0	0			0
	Other (2)		0	0			0
	Other (3)		0	0			0
	Other (4)		0	0			0
	Other (5)		0	0			0
	Other (6)		0	0			0
